# Supplementary material for: Integrating Personal Air Sensor and GPS to Determine Microenvironment-Specific Exposures to Volatile Organic Compounds
Source: MDPI journal article supplement (doi:10.3390/s21165659), 2021-08-23
Supplement: s1 [file s1]

Supplementary Material for

# Integrating Personal Air Sensor and GPS to Determine Microenvironment-specific Exposures to Volatile Organic Compounds

Michael Breen <sup>1,\*</sup>, Vlad Isakov <sup>2</sup>, Steven Prince <sup>1</sup>, Kennedy McGuinness <sup>3</sup>, Peter Egeghy <sup>4</sup>, Brent Stephens <sup>5</sup>, Sarav Arunachalam <sup>3</sup>, Dan Stout <sup>2</sup>, Richard Walker <sup>2</sup>, Lillian Alston <sup>2</sup>, Andrew Rooney <sup>6</sup>, Kyla Taylor <sup>6</sup> and Timothy Buckley <sup>4</sup>

<sup>1</sup> Center for Public Health and Environmental Assessment, U.S. Environmental Protection Agency, Research Triangle Park, NC, USA; breen.michael@epa.gov (M.B.); prince.steven@epa.gov (S.P.)

<sup>2</sup> Center for Environmental Measurement and Modeling, U.S. Environmental Protection Agency, Research Triangle Park, NC, USA; isa-kov.vlad@epa.gov (V.I.); stout.dan@epa.gov (S.D.); walker.richard@epa.gov (R.W.); alston.lillian@epa.gov (L.A.)

<sup>3</sup> Institute for the Environment, University of North Carolina at Chapel Hill, Chapel Hill, NC USA; kmcg@live.unc.edu (K.M.); sarav@email.unc.edu (S.A.)

<sup>4</sup> Center for Computational Toxicology and Exposure, U.S. Environmental Protection Agency, Research Triangle Park, NC, USA; egeghy.peter@epa.gov (P.E.); buckley.timothy@epa.gov (T.B.)

<sup>5</sup> Department of Civil, Architectural, and Environmental Engineering, Illinois Institute of Technology, Chicago, IL, USA; brent@iit.edu

<sup>6</sup> Division of the National Toxicology Program, National Institute of Environmental Health Sciences, National Institute of Health, Research Triangle Park, NC, USA; andrew.rooney@nih.gov (A.R.); kyla.taylor@nih.gov (K.T.)

\* Correspondence: breen.michael@epa.gov

## Air Exchange Rate (AER) Model

The daily AER for each participant's home was determined from questionnaires and weather using the extended Lawrence Berkeley Laboratory model (LBLX) [Breen et al., 2010]. The AER model is mechanistic by accounting for the physical driving forces of the airflows (i.e., pressure difference across building envelope from indoor-outdoor temperature differences, called the stack effect, and from wind). The LBLX model includes leakage airflow through unintentional openings in a building envelope (e.g., cracks around windows, doors), natural ventilation through controlled openings in the building envelope (e.g., open windows, doors), and mechanical ventilation from window fans.

The leakage airflow is defined as

$$Q_{\text{leak}} = A_{\text{leak}}(k_s|T_{\text{in}} - T_{\text{out}}| + k_w U^2)^{0.5} \quad [\text{S1}]$$

where  $A_{\text{leak}}$  is the effective air leakage area,  $k_s$  is the stack coefficient,  $k_w$  is the wind coefficient,  $T_{\text{in}}$  and  $T_{\text{out}}$  are the average indoor and outdoor temperatures, respectively, and  $U$  is the average wind speed. The leakage airflow has two parameters ( $k_s$  and  $k_w$ ) and five inputs ( $A_{\text{leak}}$ ,  $T_{\text{in}}$ ,  $T_{\text{out}}$ ,  $U$ , and  $V$ ). Parameters  $k_s$  and  $k_w$  were set to literature-reported values based on house-specific information on house height (number of stories) and local wind sheltering (Tables S1-S3). Using home addresses, the number of stories and local wind sheltering were determined from satellite and street-level images in Google Earth (version 7.1.7.2606; Google, Mountain View, CA, USA). We used house numbers visible in street-level images to verify the participant homes. The number of stories was verified from online county and real estate databases of property records (Zillow, Seattle, WA, USA; Trulia, San Francisco, CA, USA). To determine  $V$ , we multiplied floor area by a ceiling height of 2.44 m (8 ft). The floor area was obtained from the online county and real estate databases.

We determined  $T_{out}$  and  $U$  (10 m elevation) from hourly measurements at Raleigh Durham Airport in Morrisville, NC, USA. We calculated 24-h average  $T_{out}$  and  $U$  time-matched to the 24-h average TVOC. We determined  $T_{in}$  from daily values measured within each home.

We estimate  $A_{leak}$  with a literature-reported leakage area model (Breen et al., 2010; Chan et al., 2005). The  $A_{leak}$  is calculated as

$$A_{leak} = \frac{NL}{NF} \quad [S2]$$

where  $NL$  is the normalized leakage and  $NF$  is the normalization factor. The  $NL$  is predicted from year of construction  $Y_{built}$  and floor area  $A_{floor}$  as described by

$$NL = \exp(\beta_0 + \beta_1 Y_{built} + \beta_2 A_{floor}) \quad [S3]$$

where  $\beta_0$ ,  $\beta_1$ , and  $\beta_2$  are regression parameters. The  $NF$  is defined as

$$NF = \frac{1000}{A_{floor}} \left(\frac{H}{2.5}\right)^{0.3} \quad [S4]$$

where  $H$  is the building height. We set  $H$  to the number of stories multiplied by a story height of 2.5 m and adding a roof height of 0.5 m (Breen et al., 2010). The  $A_{floor}$  and  $Y_{built}$  were obtained from online county and real estate databases of property records as described above.

The parameters  $\beta_0$ ,  $\beta_1$ , and  $\beta_2$  were estimated by Chan et al. (2005) for low-income homes ( $\beta_0=11.1$ ,  $\beta_1=-5.37 \times 10^{-3}$ , and  $\beta_2=-4.18 \times 10^{-3} \text{m}^{-2}$ ) and conventional homes ( $\beta_0=20.7$ ,  $\beta_1=-1.07 \times 10^{-2}$ , and  $\beta_2=-2.20 \times 10^{-3} \text{m}^{-2}$ ). Low-income homes were defined as residences with household incomes below 125% of the poverty guideline. In this study, the individual household incomes were not collected. Using 2010 U.S. Census, we examined the median household income at the block group for each home. The household incomes were all substantially above 125% of the 2010 poverty guideline. Therefore, we used the literature-reported parameters for conventional homes.

For the airflow from natural ventilation  $Q_{nat}$  can be calculated as:

$$Q_{nat} = \sqrt{Q_{nat,wind}^2 + Q_{nat,stack}^2} \quad [S5]$$

where  $Q_{nat,wind}$  and  $Q_{nat,stack}$  are the airflows from the wind and stack effects, respectively. The  $Q_{nat,wind}$  is defined as:

$$Q_{nat,wind} = C_v A_{nat} U \quad [S6]$$

where  $C_v$  is the effectiveness of the openings, and the  $A_{nat}$  is the area of the inlet openings. Using literature-reported values, we set  $C_v$  to 0.3 and  $A_{nat}$  to one-half of the total area of window and door openings (Breen et al. 2010). The daily participant questionnaires were used to determine the daily duration windows and doors were opened. Window and door opening areas and durations were not collected in this study. For windows, we set  $A_{nat}$  to one-half of the literature-reported value of 619 cm<sup>2</sup>, which is the median daily total window opening area for homes in the same region of central NC as DEPS (Breen et al. 2010). For doors, we set  $A_{nat}$  to one-half of 3600 cm<sup>2</sup> (Breen et al. 2020). The  $Q_{nat,stack}$  is defined as:

$$Q_{nat,stack} = C_D A_{nat} \sqrt{2g\Delta H_{NPL}|T_{in} - T_{out}|/\max\{T_{in}, T_{out}\}} \quad [S7]$$

where  $C_D$  is the discharge coefficient for the openings,  $g$  is the gravitational acceleration,  $\Delta H_{NPL}$  is the height from midpoint of lower window opening to the neutral pressure level (NPL) of the building, and  $\max\{T_{in}, T_{out}\}$  is the maximum value between  $T_{in}$  and  $T_{out}$ . Using literature-reported values, we set  $C_D$  to 0.65, midpoint of lower window opening to 0.91 m, and NPL to one-half of  $H$  (Breen et al., 2010).

For the airflow from mechanical ventilation due to operating window fans ( $Q_{total}$ ) was calculated as follows:

$$Q_{total} = Q_{bal} + \sqrt{Q_{unbal}^2 + Q_{leak}^2 + Q_{nat}^2} \quad [S8]$$

where  $Q_{bal}$  and  $Q_{unbal}$  are balanced and unbalanced flow rate respectively,  $Q_{leak}$  is the flow from leakage, and  $Q_{nat}$  is the flow from natural ventilation. The daily participant questionnaires were used to determine number and duration that window fans were operated. Since whether the window fan system is balanced (i.e. pair of intake and exhaust fan) or unbalanced (i.e. a single intake or exhaust fan) was not recorded, we assume an unbalanced system for all houses with window fan operating ( $Q_{bal}=0$ ).  $Q_{mech}$  was set at 600 ft<sup>3</sup>/min for each window fan, which is the mid-range value for medium-size window fans (range: 300-900 ft<sup>3</sup>/min) (Breen et al., 2020)

The AER is calculated as  $Q_{total}$  divided by building volume  $V$ .

## References

Breen MS, Chang S, Breen M, Xu Y, Isakov V, Arunachalam S, Carraway M, Devlin R. Fine-scale Modeling of Individual Exposures to Ambient PM<sub>2.5</sub>, EC, NO<sub>x</sub>, CO for the Coronary Artery Disease and Environmental Exposure (CADEE) Study. *Atmosphere* 2020 11:1-65.

Breen MS, Breen M, Williams RW, Schultz BD. 2010. Predicting residential air exchange rates from questionnaires and meteorology: model evaluation in central North Carolina. *Environ Sci Technol* 44:9349-9356.

Chan WR, Nazaroff WW, Price PN, Sohn MD, Gadgil AJ. 2005. Analyzing a database of residential air leakage in the United States. *Atmos Environ* 39:3445-3455.

Breen MS, Seppanen C, Isakov V, Arunachalam S, Breen M, Samet J, Tong H. Development of TracMyAir smartphone application for modeling exposures to ambient PM<sub>2.5</sub> and ozone. *Int J Environ Res Public Health* 2019, doi:10.3390/ijerph16183468.

**Table S1.** Stack coefficient<sup>1</sup>  $k_s$  [(L/s)<sup>2</sup>/(cm<sup>4</sup> K)]

|                   | House height (stories) |          |          |
|-------------------|------------------------|----------|----------|
|                   | One                    | Two      | Three    |
| Stack coefficient | 0.000145               | 0.000290 | 0.000435 |

<sup>1</sup>ASHRAE Handbook-Fundamentals, 2009**Table S2.** Wind coefficient<sup>1</sup>  $k_w$  [(L/s)<sup>2</sup>/(cm<sup>4</sup> (m/s)<sup>2</sup>)]

| Shelter class | House height (stories) |          |          |
|---------------|------------------------|----------|----------|
|               | One                    | Two      | Three    |
| 1             | 0.000319               | 0.000420 | 0.000494 |
| 2             | 0.000246               | 0.000325 | 0.000382 |
| 3             | 0.000174               | 0.000231 | 0.000271 |
| 4             | 0.000104               | 0.000137 | 0.000161 |
| 5             | 0.000032               | 0.000042 | 0.000049 |

<sup>1</sup>ASHRAE Handbook-Fundamentals, 2009**Table S3.** Local Sheltering<sup>1</sup>

| Shelter class | Description                                                                                                                                                                            |
|---------------|----------------------------------------------------------------------------------------------------------------------------------------------------------------------------------------|
| 1             | No obstructions or local sheltering                                                                                                                                                    |
| 2             | Typical shelter for an isolated rural house                                                                                                                                            |
| 3             |                                                                                                                                                                                        |
| 4             | Typical shelter caused by other buildings across street from building under study                                                                                                      |
| 5             | Typical shelter for urban buildings on larger lots where sheltering obstacles are more than one building height away                                                                   |
| 5             | Typical shelter produced by buildings or other structures immediately adjacent (closer than one building height): e.g., neighboring houses on same side of street, trees, bushes, etc. |

<sup>1</sup>ASHRAE Handbook-Fundamentals, 2009

## References

The 2009 ASHRAE Handbook-Fundamentals, American Society of Heating, Refrigerating, and Air Conditioning Engineers: Atlanta, GA, 2009.

## Estimating Removal and Emission Rates

The removal rates were estimated using

$$C(t) = (C_p - C_b) e^{-k(t-t_p)} + C_b \quad t \geq t_p \quad [S9]$$

where  $C$  is the TVOC concentration in the home (ppb),  $t$  is the time (h),  $k$  is the removal rate ( $\text{h}^{-1}$ ) that includes removal due to air exchange rate as well as other possible processes,  $C_b$  is the background TVOC concentration (ppb),  $C_p$  is the peak TVOC concentration (ppb), and  $t_p$  is the time when the peak concentration occurs (h) (Olson et al. 2006). Taking the natural logarithm (ln) yields

$$k = [\ln(C_p - C_b) - \ln(C(t) - C_b)] / (t - t_p) \quad t \geq t_p \quad [S10]$$

The emission rates were estimated using

$$C(t) = C_b + [E/(kV)](1 - e^{-kt}) \quad t \leq t_p \quad [S11]$$

where  $E$  is the emission rate ( $\text{ppb m}^3 \text{ h}^{-1}$ ), and  $V$  is the volume of home ( $\text{m}^3$ ) (Olson et al. 2006). Solving for  $E$  yields

$$E = (C(t) - C_b) [kV / (1 - e^{-kt})] \quad t \leq t_p \quad [S12]$$

To determine  $E$  in  $\mu\text{g h}^{-1}$ , we calculated the factor for converting from ppb to  $\mu\text{g m}^{-3}$ . The PID is calibrated with isobutylene (IBE) standard gas, and thus the readings are IBE-based concentrations. The  $E$  in  $\mu\text{g h}^{-1}$  is

$$E (\mu\text{g h}^{-1}) = E (\text{ppb m}^3 \text{ h}^{-1}) (56.106 / 24.45) \quad [S13]$$

where 24.45 is the volume (L) of a mole (gram molecular weight) of a gas at 1 atmospheric pressure and 25 °C, and 56.106 is the molecular weight ( $\text{g mol}^{-1}$ ) of isobutylene.

For each high exposure event when indoors at home, the removal rate was first calculated, and then used to determine the emission rate.

## References

Olson, D.A.; Burke, J.M. Distributions of PM<sub>2.5</sub> source strengths for cooking from the research triangle park particulate matter panel study. *Environ. Sci. Technol.* **2006**, *40*, 163-169.

**Table S4.** Summary statistics of the 1-min TVOC exposures and ME.

| Participant                           | Percentile | Home-In | Other-In | In-Vehicle | Out   |
|---------------------------------------|------------|---------|----------|------------|-------|
| P01<br>3 days<br>8/15/18 - 8/17/18    | 5          | 159     | 55       | 6          | 22    |
|                                       | 25         | 181     | 80       | 36         | 32    |
|                                       | 50         | 416     | 101      | 91         | 37    |
|                                       | 75         | 485     | 107      | 147        | 78    |
|                                       | 95         | 1538    | 119      | 476        | 88    |
|                                       | mean       | 478     | 92.6     | 150.4      | 50.3  |
|                                       | n          | 1935    | 409      | 207        | 94    |
| P02<br>11 days<br>9/24/18 - 10/04/18  | 5          | 92      | 2        | 4          | 2     |
|                                       | 25         | 134     | 26       | 22         | 25    |
|                                       | 50         | 209     | 114      | 52         | 55    |
|                                       | 75         | 285     | 269      | 137        | 83    |
|                                       | 95         | 682     | 657      | 464        | 298   |
|                                       | mean       | 271.8   | 209.5    | 118.4      | 83.2  |
|                                       | n          | 11837   | 705      | 460        | 168   |
| P06<br>10 days<br>11/05/18 - 11/14/18 | 5          | 4       | 2        | 3          | 4     |
|                                       | 25         | 21      | 20       | 13         | 18    |
|                                       | 50         | 38      | 92       | 74         | 74    |
|                                       | 75         | 74      | 174      | 206        | 390   |
|                                       | 95         | 412     | 378      | 1097       | 1298  |
|                                       | mean       | 113.1   | 136.6    | 200.3      | 299.8 |
|                                       | n          | 4557    | 655      | 321        | 286   |
| P07<br>10 days<br>10/22/18 - 10/31/18 | 5          | 4       | 2        | 1          | 1     |
|                                       | 25         | 24      | 14       | 4          | 6     |
|                                       | 50         | 129     | 40       | 24         | 31    |
|                                       | 75         | 355     | 86       | 47         | 90    |
|                                       | 95         | 1439    | 162      | 334        | 1239  |
|                                       | mean       | 335.5   | 53.8     | 62.3       | 199.5 |
|                                       | n          | 2249    | 317      | 123        | 64    |
| P11<br>11 days<br>11/27/18 - 12/07/18 | 5          | 3       | 4        | 2          | 2     |
|                                       | 25         | 19      | 16       | 11         | 19    |
|                                       | 50         | 60      | 38       | 24         | 33    |
|                                       | 75         | 254     | 190      | 352        | 46    |
|                                       | 95         | 1942    | 341      | 389        | 91    |
|                                       | mean       | 574.6   | 115.1    | 136.7      | 44.5  |
|                                       | n          | 1836    | 537      | 202        | 153   |
| All<br>45 days<br>8/15/18 - 12/07/18  | 5          | 10      | 3        | 2          | 3     |
|                                       | 25         | 71      | 23       | 15         | 22    |
|                                       | 50         | 165     | 86       | 52         | 46    |
|                                       | 75         | 273     | 164      | 158        | 93    |
|                                       | 95         | 904     | 420      | 475        | 993   |
|                                       | mean       | 288.5   | 134.9    | 141        | 162.1 |
|                                       | n          | 22414   | 2623     | 1313       | 765   |

**Table S5.** Summary table of house characteristics, weather, and air exchange rates.

| P# | Area<br>(m <sup>2</sup> ) | Year<br>built | Leakage<br>(cm <sup>2</sup> ) | Volume<br>(m <sup>3</sup> ) | Month | Day | Wind<br>Speed<br>(m/s) | Temp<br>(C) | Temp<br>diff<br>(C) | Windows<br>or doors<br>opened | AER<br>(1/h) | VOC<br>Conc<br>(ppb) |
|----|---------------------------|---------------|-------------------------------|-----------------------------|-------|-----|------------------------|-------------|---------------------|-------------------------------|--------------|----------------------|
| 1  | 245.3                     | 2001          | 554.6                         | 598.5                       | 8     | 15  | 1.6                    | 27.9        | 1.0                 | No                            | 0.04         | 828.7                |
| 1  | 245.3                     | 2001          | 554.6                         | 598.5                       | 8     | 16  | 1.5                    | 26.7        | 0.6                 | No                            | 0.03         | 237.0                |
| 1  | 245.3                     | 2001          | 554.6                         | 598.5                       | 8     | 17  | 3.7                    | 25.1        | 3.3                 | No                            | 0.08         | 191.3                |
| 2  | 229.3                     | 2010          | 487.7                         | 559.5                       | 9     | 24  | 2.7                    | 21.5        | 3.4                 | Yes                           | 0.16         | 156.9                |
| 2  | 229.3                     | 2010          | 487.7                         | 559.5                       | 9     | 25  | 1.8                    | 23.5        | 2.2                 | No                            | 0.06         | 105.8                |
| 2  | 229.3                     | 2010          | 487.7                         | 559.5                       | 9     | 26  | 2.6                    | 24.2        | 1.6                 | No                            | 0.05         | 247.7                |
| 2  | 229.3                     | 2010          | 487.7                         | 559.5                       | 9     | 27  | 2.1                    | 23.2        | 2.9                 | No                            | 0.07         | 172.1                |
| 2  | 229.3                     | 2010          | 487.7                         | 559.5                       | 9     | 28  | 2.4                    | 22.2        | 3.2                 | No                            | 0.07         | 430.1                |
| 2  | 229.3                     | 2010          | 487.7                         | 559.5                       | 9     | 29  | 1.6                    | 21.4        | 3.5                 | No                            | 0.07         | 395.1                |
| 2  | 229.3                     | 2010          | 487.7                         | 559.5                       | 9     | 30  | 2.0                    | 21.1        | 3.4                 | Yes                           | 0.16         | 219.2                |
| 2  | 229.3                     | 2010          | 487.7                         | 559.5                       | 10    | 1   | 1.1                    | 21.3        | 2.9                 | Yes                           | 0.15         | 128.6                |
| 2  | 229.3                     | 2010          | 487.7                         | 559.5                       | 10    | 2   | 1.9                    | 21.9        | 2.8                 | No                            | 0.06         | 368.8                |
| 2  | 229.3                     | 2010          | 487.7                         | 559.5                       | 10    | 3   | 1.4                    | 23.2        | 1.5                 | Yes                           | 0.11         | 276.8                |
| 2  | 229.3                     | 2010          | 487.7                         | 559.5                       | 10    | 4   | 1.4                    | 22.0        | 3.0                 | No                            | 0.07         | 222.3                |
| 6  | 139.4                     | 2006          | 377.1                         | 340.1                       | 11    | 5   | 1.3                    | 15.1        | 10.4                | Yes                           | 0.44         | 396.8                |
| 6  | 139.4                     | 2006          | 377.1                         | 340.1                       | 11    | 6   | 4.0                    | 18.6        | 6.9                 | Yes                           | 0.36         | 63.3                 |
| 6  | 139.4                     | 2006          | 377.1                         | 340.1                       | 11    | 7   | 0.7                    | 15.4        | 8.3                 | Yes                           | 0.40         | 55.9                 |
| 6  | 139.4                     | 2006          | 377.1                         | 340.1                       | 11    | 8   | 3.4                    | 14.3        | 8.8                 | Yes                           | 0.42         | 100.9                |
| 6  | 139.4                     | 2006          | 377.1                         | 340.1                       | 11    | 9   | 2.6                    | 11.0        | 11.6                | No                            | 0.16         | 138.8                |
| 6  | 139.4                     | 2006          | 377.1                         | 340.1                       | 11    | 10  | 3.1                    | 7.6         | 13.0                | No                            | 0.17         | 141.3                |
| 6  | 139.4                     | 2006          | 377.1                         | 340.1                       | 11    | 11  | 2.0                    | 3.6         | 17.1                | No                            | 0.20         | 32.7                 |
| 6  | 139.4                     | 2006          | 377.1                         | 340.1                       | 11    | 12  | 2.5                    | 6.1         | 14.8                | No                            | 0.19         | 5.0                  |
| 6  | 139.4                     | 2006          | 377.1                         | 340.1                       | 11    | 13  | 1.6                    | 9.3         | 11.4                | No                            | 0.16         | 204.7                |
| 6  | 139.4                     | 2006          | 377.1                         | 340.1                       | 11    | 14  | 2.9                    | 7.2         | 11.0                | No                            | 0.16         | 40.9                 |
| 7  | 143.8                     | 1977          | 525.4                         | 350.9                       | 10    | 22  | 2.4                    | 12.1        | 10.8                | No                            | 0.21         | 365.2                |
| 7  | 143.8                     | 1977          | 525.4                         | 350.9                       | 10    | 23  | 2.3                    | 11.4        | 15.2                | No                            | 0.25         | 57.4                 |
| 7  | 143.8                     | 1977          | 525.4                         | 350.9                       | 10    | 24  | 1.8                    | 9.7         | 15.5                | No                            | 0.26         | 341.1                |
| 7  | 143.8                     | 1977          | 525.4                         | 350.9                       | 10    | 25  | 0.7                    | 7.6         | 15.3                | No                            | 0.25         | 55.2                 |
| 7  | 143.8                     | 1977          | 525.4                         | 350.9                       | 10    | 26  | 3.8                    | 7.6         | 14.8                | No                            | 0.25         | 776.0                |
| 7  | 143.8                     | 1977          | 525.4                         | 350.9                       | 10    | 27  | 4.3                    | 10.5        | 9.9                 | No                            | 0.21         | 28.9                 |
| 7  | 143.8                     | 1977          | 525.4                         | 350.9                       | 10    | 28  | 4.1                    | 11.7        | 10.1                | No                            | 0.21         | 71.5                 |
| 7  | 143.8                     | 1977          | 525.4                         | 350.9                       | 10    | 29  | 2.8                    | 12.0        | 10.4                | No                            | 0.21         | 20.3                 |
| 7  | 143.8                     | 1977          | 525.4                         | 350.9                       | 10    | 30  | 0.6                    | 9.8         | 12.9                | No                            | 0.23         | 543.2                |
| 7  | 143.8                     | 1977          | 525.4                         | 350.9                       | 10    | 31  | 2.6                    | 8.4         | 13.3                | No                            | 0.24         | 366.1                |
| 11 | 102.2                     | 1984          | 379.7                         | 249.4                       | 11    | 27  | 3.7                    | 4.9         | 21.0                | No                            | 0.30         | 201.0                |
| 11 | 102.2                     | 1984          | 379.7                         | 249.4                       | 11    | 28  | 3.2                    | 0.2         | 23.4                | No                            | 0.32         | 61.2                 |
| 11 | 102.2                     | 1984          | 379.7                         | 249.4                       | 11    | 29  | 1.6                    | 3.7         | 19.6                | No                            | 0.29         | 169.9                |
| 11 | 102.2                     | 1984          | 379.7                         | 249.4                       | 11    | 30  | 4.2                    | 12.6        | 10.8                | No                            | 0.22         | 221.0                |
| 11 | 102.2                     | 1984          | 379.7                         | 249.4                       | 12    | 1   | 2.6                    | 13.3        | 10.4                | No                            | 0.21         | 1216.7               |
| 11 | 102.2                     | 1984          | 379.7                         | 249.4                       | 12    | 2   | 5.2                    | 18.5        | 6.0                 | Yes                           | 0.47         | 24.6                 |
| 11 | 102.2                     | 1984          | 379.7                         | 249.4                       | 12    | 3   | 2.7                    | 14.5        | 9.2                 | Yes                           | 0.58         | 26.6                 |
| 11 | 102.2                     | 1984          | 379.7                         | 249.4                       | 12    | 4   | 2.1                    | 8.0         | 14.0                | No                            | 0.25         | 0                    |
| 11 | 102.2                     | 1984          | 379.7                         | 249.4                       | 12    | 5   | 2.0                    | 4.7         | 15.9                | No                            | 0.26         | 17.0                 |
| 11 | 102.2                     | 1984          | 379.7                         | 249.4                       | 12    | 6   | 1.9                    | 2.1         | 18.4                | No                            | 0.28         | 1883.2               |
| 11 | 102.2                     | 1984          | 379.7                         | 249.4                       | 12    | 7   | 1.2                    | 3.2         | 18.7                | No                            | 0.29         | 0                    |

**Table S6.** Characteristics of the HEE at “Home-In” locations.

| P# | VOC<br>(ppb) | Duration<br>(min) | Day and Time      |
|----|--------------|-------------------|-------------------|
| 1  | 501          | 12                | 8/15 23:47-23:59  |
| 1  | 505          | 41                | 8/15 22:41-23:22  |
| 1  | 605          | 28                | 8/15 20:57-21:25  |
| 1  | 631          | 6                 | 8/16 8:22-8:28    |
| 1  | 1312         | 335               | 8/15 10:25-16:0   |
| 2  | 504          | 5                 | 9/26 16:30-16:35  |
| 2  | 504          | 5                 | 9/28 20:27-20:32  |
| 2  | 504          | 1                 | 9/29 13:17-13:17  |
| 2  | 508          | 12                | 9/29 9:48-10:0    |
| 2  | 509          | 4                 | 9/29 18:59-19:3   |
| 2  | 514          | 160               | 9/29 1:14-3:54    |
| 2  | 533          | 199               | 9/28 20:43-24:2   |
| 2  | 592          | 78                | 9/24 10:37-11:55  |
| 2  | 642          | 2                 | 9/29 10:54-10:56  |
| 2  | 684          | 169               | 9/28 15:20-18:9   |
| 2  | 712          | 1                 | 9/27 19:15-19:15  |
| 2  | 795          | 6                 | 9/29 9:1-9:7      |
| 2  | 846          | 23                | 9/29 14:43-15:6   |
| 2  | 870          | 15                | 9/30 10:41-10:56  |
| 2  | 899          | 335               | 10/2 13:16-18:51  |
| 2  | 945          | 130               | 9/26 13:31-15:42  |
| 2  | 1104         | 25                | 9/24 15:27-15:52  |
| 2  | 1165         | 9                 | 9/30 18:22-18:31  |
| 2  | 1192         | 2                 | 9/24 16:45-16:47  |
| 2  | 1228         | 6                 | 9/30 11:30-11:36  |
| 2  | 1320         | 161               | 9/28 9:21-12:2    |
| 2  | 1496         | 1                 | 9/25 7:28-7:28    |
| 2  | 1586         | 3                 | 9/29 13:52-13:55  |
| 6  | 531          | 4                 | 11/5 19:6-19:10   |
| 6  | 539          | 9                 | 11/5 20:15-20:24  |
| 6  | 617          | 4                 | 11/5 12:44-12:48  |
| 6  | 672          | 1                 | 11/8 8:42-8:43    |
| 6  | 726          | 31                | 11/5 18:15-18:46  |
| 6  | 735          | 30                | 11/13 10:35-11:5  |
| 6  | 934          | 1                 | 11/7 8:44-8:44    |
| 6  | 1025         | 1                 | 11/6 8:34-8:34    |
| 6  | 1293         | 34                | 11/5 11:54-12:28  |
| 6  | 1309         | 2                 | 11/13 11:54-11:56 |
| 6  | 1685         | 1                 | 11/10 17:21-17:21 |



|    |      |     |                   |
|----|------|-----|-------------------|
| 6  | 1741 | 1   | 11/10 18:12-18:13 |
| 6  | 1790 | 35  | 11/10 8:17-8:52   |
| 6  | 2694 | 1   | 11/13 8:36-8:37   |
| 6  | 2793 | 1   | 11/14 8:37-8:37   |
| 6  | 2878 | 21  | 11/5 17:42-18:3   |
| 7  | 564  | 1   | 10/25 14:1-14:1   |
| 7  | 617  | 1   | 10/30 17:9-17:9   |
| 7  | 661  | 1   | 10/24 10:40-10:40 |
| 7  | 715  | 1   | 10/30 17:46-17:46 |
| 7  | 805  | 2   | 10/31 10:32-10:34 |
| 7  | 1099 | 160 | 10/24 10:46-13:26 |
| 7  | 1133 | 111 | 10/22 11:47-13:38 |
| 7  | 1213 | 152 | 10/30 10:18-12:50 |
| 7  | 1687 | 46  | 10/26 10:26-11:12 |
| 11 | 604  | 2   | 11/28 8:47-8:49   |
| 11 | 617  | 5   | 11/29 12:20-12:25 |
| 11 | 686  | 73  | 11/27 12:3-13:16  |
| 11 | 1108 | 82  | 11/29 10:29-11:51 |
| 11 | 1910 | 10  | 11/30 12:32-12:42 |
| 11 | 3399 | 34  | 12/6 12:4-12:38   |
| 11 | 9057 | 69  | 12/1 9:28-10:37   |

**Table S7.** Characteristics of the HEE at “Other-In” locations.

| P# | VOC<br>(ppb) | Duration<br>(min) | Day and Time      | Location                |
|----|--------------|-------------------|-------------------|-------------------------|
| 2  | 508          | 1                 | 9/25 10:45-10:45  | Clinical Research Unit  |
| 2  | 534          | 3                 | 9/29 12:47-12:50  | Store                   |
| 2  | 551          | 1                 | 9/28 12:31-12:31  | Restaurant              |
| 2  | 578          | 12                | 9/29 17:57-18:09  | Restaurant              |
| 2  | 659          | 10                | 9/28 19:52-20:02  | Restaurant              |
| 2  | 682          | 42                | 9/29 11:40-12:22  | Restaurant              |
| 2  | 708          | 5                 | 9/28 19:26-19:31  | Store                   |
| 2  | 1482         | 1                 | 9/28 13:15-13:15  | Restaurant              |
| 6  | 612          | 1                 | 11/08 17:18-17:18 | Childcare center        |
| 6  | 765          | 16                | 11/13 18:39-18:55 | Store                   |
| 6  | 1017         | 1                 | 11/13 10:00-10:01 | Church                  |
| 11 | 519          | 1                 | 11/30 18:30-18:30 | Indoor residential home |
| 11 | 2319         | 2                 | 12/01 13:43-13:45 | Restaurant              |

**Table S8.** Characteristics of the HEE at “In-Vehicle” locations.

| <b>P#</b> | <b>VOC<br/>(ppb)</b> | <b>Duration<br/>(min)</b> | <b>Day and Time</b> |
|-----------|----------------------|---------------------------|---------------------|
| 1         | 614                  | 1                         | 8/16 8:30-8:31      |
| 1         | 1372                 | 6                         | 8/15 16:1-16:7      |
| 2         | 597                  | 6                         | 9/29 17:38-17:44    |
| 2         | 645                  | 2                         | 9/29 12:25-12:27    |
| 2         | 2170                 | 9                         | 10/3 11:14-11:23    |
| 6         | 714                  | 7                         | 11/13 9:51-9:58     |
| 6         | 831                  | 9                         | 11/9 9:47-9:56      |
| 6         | 942                  | 24                        | 11/9 9:57-10:21     |
| 6         | 1152                 | 10                        | 11/13 10:24-10:34   |
| 6         | 1186                 | 3                         | 11/13 10:3-10:6     |
| 7         | 589                  | 1                         | 10/24 8:25-8:26     |
| 11        | 650                  | 1                         | 11/30 14:12-14:12   |

**Table S9.** Characteristics of the HEE at “Out” locations.

| <b>P#</b> | <b>VOC<br/>(ppb)</b> | <b>Duration<br/>(min)</b> | <b>Day and Time</b> | <b>Location</b> |
|-----------|----------------------|---------------------------|---------------------|-----------------|
| 2         | 674                  | 1                         | 09/28 13:16-13:16   | near restaurant |
| 6         | 785                  | 1                         | 11/13 9:50-9:50     | near residence  |
| 6         | 904                  | 1                         | 11/08 12:44-12:45   | near church     |
| 6         | 945                  | 13                        | 11/17 10:5-10:18    | near church     |
| 6         | 958                  | 1                         | 11/13 9:59-9:59     | near church     |
| 6         | 1017                 | 1                         | 11/13 10:2-10:2     | near church     |
| 6         | 1406                 | 5                         | 11/08 13:1-13:6     | near church     |
| 6         | 1433                 | 16                        | 11/13- 10:7-10:23   | near church     |
| 7         | 1508                 | 4                         | 10/24 10:41-10:45   | near residence  |
